# Supplementary material
Source: publisher figshare collection journal article supplement (https://acs.figshare.com/ndownloader/files/18018338)
Supplement: Supplementary file 1 [file 18018338]

## Supporting Information

### Nitrate and phosphate transporters rescue fluoride toxicity in yeast

*Nichole R. Johnston<sup>†</sup> and Scott A. Strobel<sup>†, ‡\*</sup>*

From the <sup>†</sup>Department of Molecular Biophysics and Biochemistry, Yale University, New Haven, Connecticut 06520; <sup>‡</sup>Department of Chemistry, Yale University, New Haven, Connecticut 06520

\*Corresponding author: Prof. Scott A. Strobel, Department of Molecular Biophysics and Biochemistry, Yale University, New Haven CT 06520; [scott.strobel@yale.edu](mailto:scott.strobel@yale.edu); Tel. (203) 432-9772; Fax. (203) 432-5767.

#### TABLE OF CONTENTS.

| Content of SI | Location |
|---------------|----------|
| Figure S1     | Page S2  |
| Figure S2     | Page S3  |
| Figure S3     | Page S4  |
| Figure S4     | Page S5  |
| Figure S5     | Page S6  |
| Figure S6     | Page S7  |

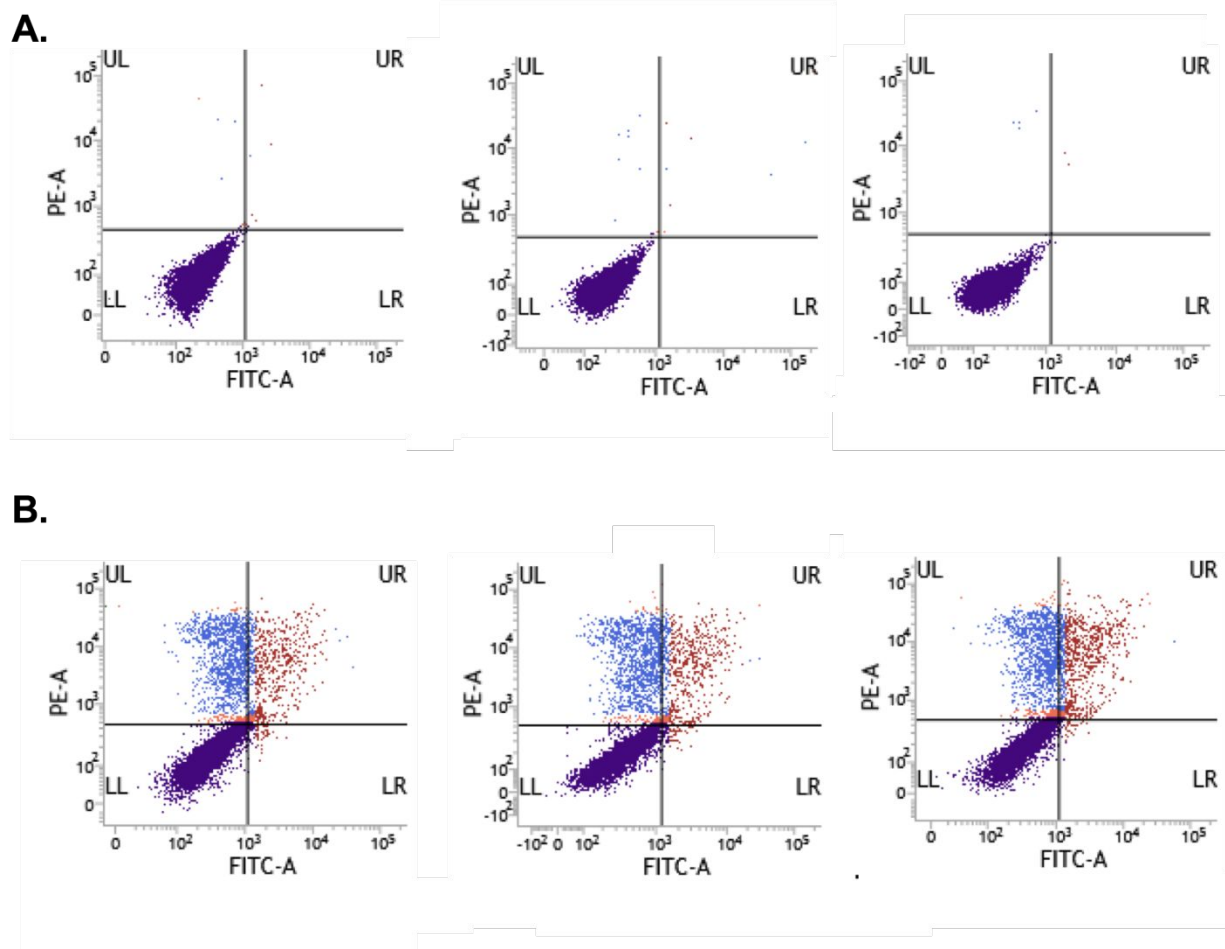

**Figure S1:** Flow cytometry of FEX DKO yeast. Shown here are the gates drawn for cells after 24 hours growth in (A) YPD or (B) YPD + 50  $\mu$ M NaF. The viability shown in Figure 1 represents the population of cells in the lower left, with low propidium iodide and annexin staining.

**A.**

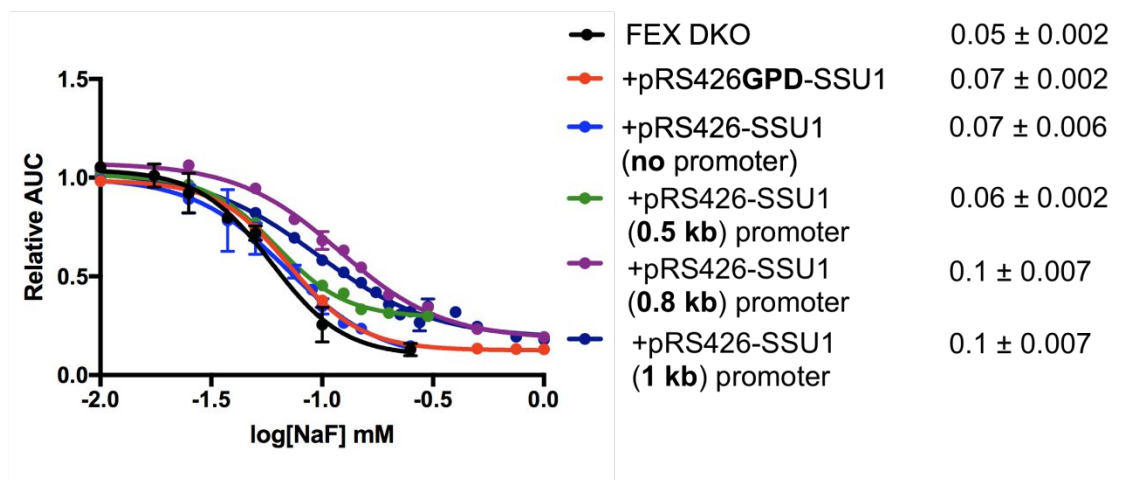

**B.**

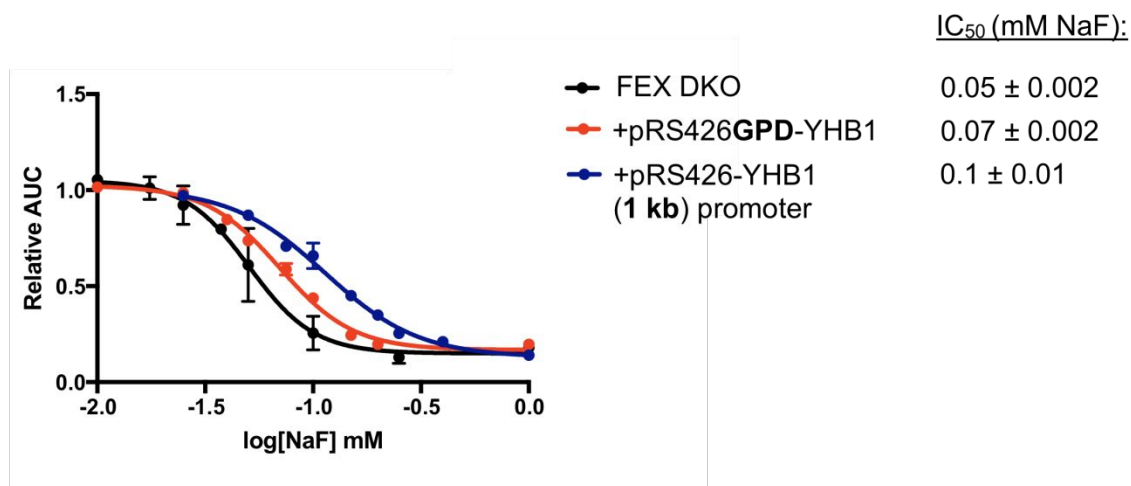

**Figure S2:** Effect of promoter for SSU1 and YHB1 on fluoride toxicity in FEX DKO *S. cerevisiae*. Liquid growth assay over 24 hours of FEX DKO yeast containing pRS426 plasmids with varying promoter lengths preceding (A) SSU1 or (B) YHB1.

**A.**

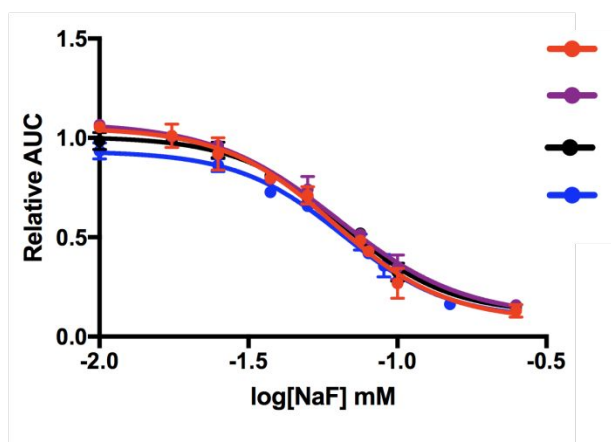

IC<sub>50</sub> (mM NaF):

0.05 ± 0.02

0.06 ± 0.03

0.07 ± 0.02

0.07 ± 0.02

**B.**

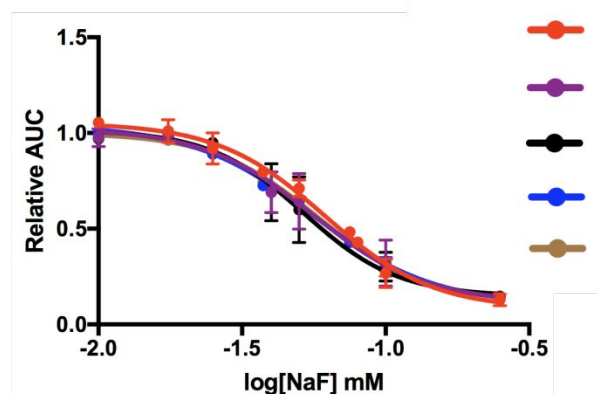

IC<sub>50</sub> (mM NaF):

0.05 ± 0.02

0.06 ± 0.04

0.05 ± 0.03

0.06 ± 0.02

0.06 ± 0.02

**Figure S3:** Increased expression of known fluoride targets and their concurrent resistance to fluoride in yeast growth. Liquid growth assay of FEX DKO cells +/- pRS426GPD plasmids over a 24-hour period for proteins involved in (A) oxidative stress response and (B) glycolysis.

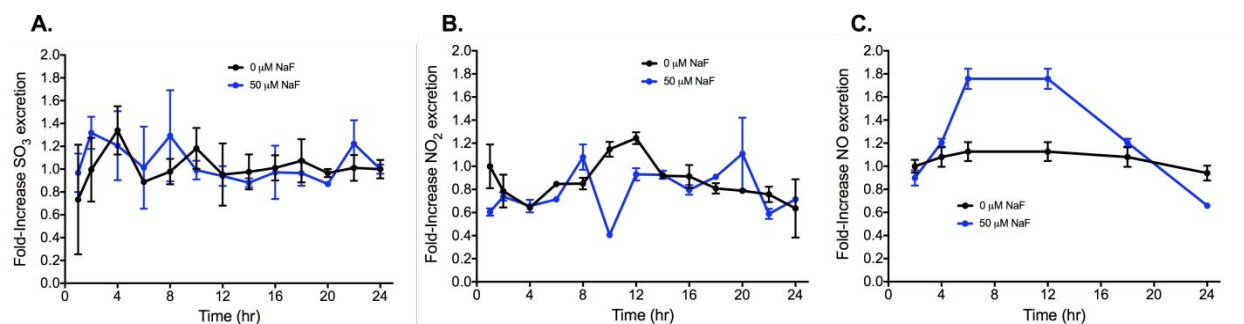

**Figure S4:** Fold-change in ion concentration over time of (A) extracellular sulfite, (B) extracellular nitrite, and (C) intracellular nitric oxide.

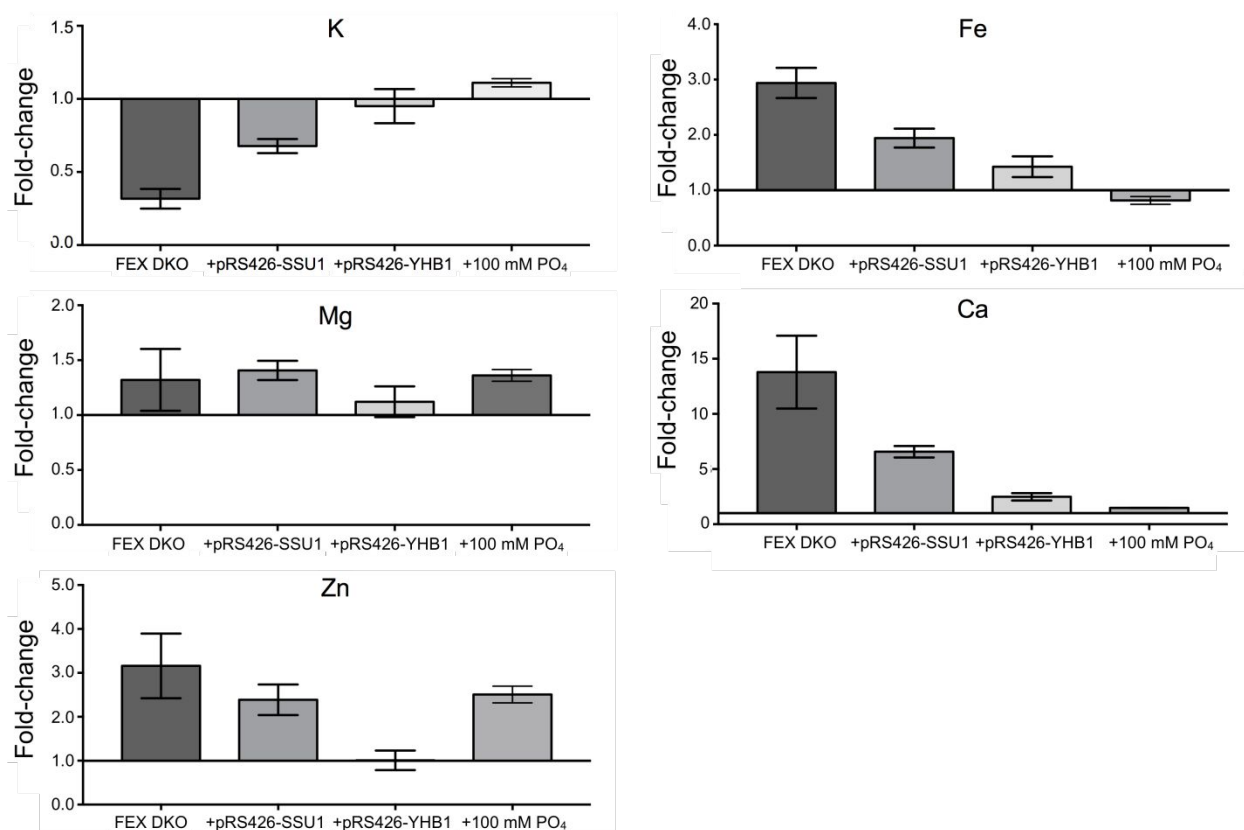

**Figure S5:** ICP-MS data for FEX DKO after 24 hours growth in YPD + 50  $\mu$ M NaF with either no plasmid, pRS426-SSU1, or pRS426-YHB1. Data is represented as fold-change in intracellular ion concentration compared with FEX DKO grown in YPD for 24 hours.

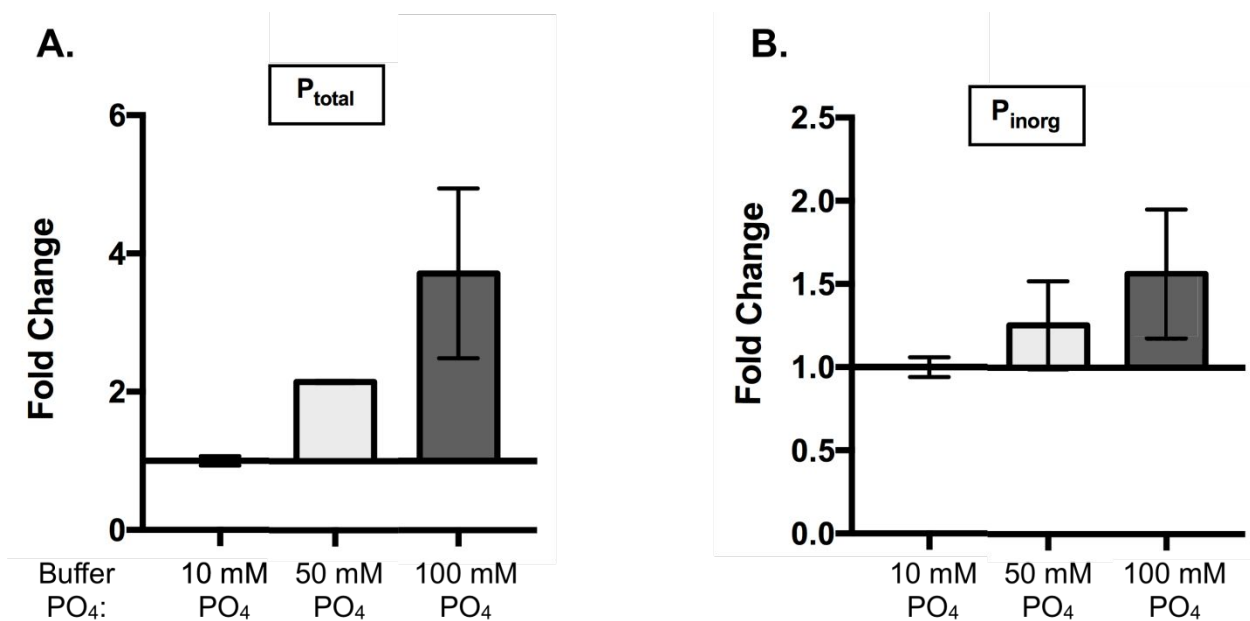

**Figure S6:** Intracellular phosphate of FEX DKO yeast in increasing YPD-phosphate buffer. (A) Fold change of total phosphate or (B) orthophosphate, as compared to cells grown in 10 mM  $\text{PO}_4$ .
